# Supplementary material for: Transcriptomic Analysis of Wheat Seedling Responses to the Systemic Acquired Resistance Inducer N-Hydroxypipecolic Acid
Source: Front Microbiol. 2021 Feb 11;12:621336. doi: 10.3389/fmicb.2021.621336 (PMC7905219; doi:10.3389/fmicb.2021.621336)
Supplement: Supplementary Table 4 — Detailed information of GO terms that were overrepresented among the upregulated genes. [file Table_4.XLSX]

## Sheet: SupTable4
Supplementary table 4. Detailed information of GO terms that were over represented among the upregulated genes.
	GO ID	Description	GeneRatio	BgRatio	pvalue	p.adjust	qvalue	Gene Count	IDs of wheat genes in this GO term
1	GO:0006260	DNA replication	51/1347	226/76173	1.41e-40	8.19e-38	5.5e-38	51	TraesCS1A02G264000/TraesCS5D02G100800/TraesCS5A02G088400/TraesCS5B02G094600/TraesCS7D02G130500/TraesCS1A02G299500/TraesCS1D02G264100/TraesCS3D02G203400/TraesCS1B02G309300/TraesCS3B02G112900/TraesCS4D02G246300/TraesCS1B02G274600/TraesCS6A02G360600/TraesCS4A02G058000/TraesCS1B02G146200/TraesCS7A02G131200/TraesCS7B02G031500/TraesCS3A02G380100/TraesCS1D02G298400/TraesCS6D02G344100/TraesCS2B02G556100/…
2	GO:0003777	microtubule motor activity	40/1347	162/76173	8.74e-34	1.69e-31	1.14e-31	40	TraesCS5A02G556500/TraesCS5B02G074200/TraesCS5D02G399800/TraesCS5A02G390000/TraesCS2D02G322800/TraesCS6D02G091600/TraesCS2D02G154600/TraesCS5D02G162500/TraesCS5B02G395000/TraesCS7D02G278800/TraesCS5A02G036600/TraesCS5B02G032700/TraesCS5B02G156500/TraesCS5B02G037500/TraesCS2B02G174600/TraesCS6D02G363400/TraesCS5D02G040800/TraesCS5A02G067300/TraesCS5D02G078500/TraesCS2A02G149500/TraesCS7A02G279000/…
3	GO:0007018	microtubule-based movement	40/1347	162/76173	8.74e-34	1.69e-31	1.14e-31	40	TraesCS5A02G556500/TraesCS5B02G074200/TraesCS5D02G399800/TraesCS5A02G390000/TraesCS2D02G322800/TraesCS6D02G091600/TraesCS2D02G154600/TraesCS5D02G162500/TraesCS5B02G395000/TraesCS7D02G278800/TraesCS5A02G036600/TraesCS5B02G032700/TraesCS5B02G156500/TraesCS5B02G037500/TraesCS2B02G174600/TraesCS6D02G363400/TraesCS5D02G040800/TraesCS5A02G067300/TraesCS5D02G078500/TraesCS2A02G149500/TraesCS7A02G279000/…
4	GO:0042555	MCM complex	18/1347	18/76173	2.56e-32	3.71e-30	2.5e-30	18	TraesCS1A02G264000/TraesCS5D02G100800/TraesCS5A02G088400/TraesCS5B02G094600/TraesCS1A02G299500/TraesCS1D02G264100/TraesCS3D02G203400/TraesCS1B02G309300/TraesCS1B02G274600/TraesCS6A02G360600/TraesCS1B02G146200/TraesCS1D02G298400/TraesCS6D02G344100/TraesCS1A02G129400/TraesCS6B02G393500/TraesCS3A02G200400/TraesCS3B02G224600/TraesCS1D02G125300
5	GO:0008017	microtubule binding	43/1347	271/76173	9.8e-28	1.14e-25	7.65e-26	43	TraesCS5A02G556500/TraesCS5B02G074200/TraesCS5D02G399800/TraesCS5A02G390000/TraesCS2D02G322800/TraesCS6D02G091600/TraesCS2D02G154600/TraesCS5D02G162500/TraesCS6D02G278500/TraesCS5B02G395000/TraesCS7D02G278800/TraesCS5A02G036600/TraesCS5B02G032700/TraesCS5B02G156500/TraesCS5B02G037500/TraesCS2B02G174600/TraesCS6D02G363400/TraesCS5D02G040800/TraesCS5A02G067300/TraesCS5D02G078500/TraesCS2A02G149500/…
6	GO:0006270	DNA replication initiation	21/1347	38/76173	2.93e-27	2.84e-25	1.91e-25	21	TraesCS1A02G264000/TraesCS5D02G100800/TraesCS5A02G088400/TraesCS5B02G094600/TraesCS1A02G299500/TraesCS1D02G264100/TraesCS3D02G203400/TraesCS1B02G309300/TraesCS1B02G274600/TraesCS6A02G360600/TraesCS1B02G146200/TraesCS5B02G141300/TraesCS1D02G298400/TraesCS6D02G344100/TraesCS4B02G129200/TraesCS1A02G129400/TraesCS6B02G393500/TraesCS3A02G200400/TraesCS5D02G149500/TraesCS3B02G224600/TraesCS1D02G125300
7	GO:0004386	helicase activity	26/1347	175/76173	1.28e-16	1.07e-14	7.16e-15	26	TraesCS1A02G264000/TraesCS5D02G100800/TraesCS5A02G088400/TraesCS1A02G299500/TraesCS5D02G125100/TraesCS1B02G309300/TraesCS1B02G274600/TraesCS6A02G360600/TraesCS2D02G302700/TraesCS5A02G114400/TraesCS1D02G298400/TraesCS3D02G025600/TraesCS3B02G024900/TraesCS3B02G129700/TraesCS6B02G393500/TraesCS1D02G089500/TraesCS5D02G127000/TraesCS4A02G158200/TraesCS5B02G504900/TraesCS2A02G304900/TraesCS1D02G148100/…
8	GO:0000347	THO complex	12/1347	23/76173	1.01e-15	7.31e-14	4.91e-14	12	TraesCS1A02G264000/TraesCS5D02G100800/TraesCS5A02G088400/TraesCS5B02G094600/TraesCS1A02G299500/TraesCS3D02G203400/TraesCS1B02G309300/TraesCS1B02G274600/TraesCS6A02G360600/TraesCS1D02G298400/TraesCS3A02G200400/TraesCS3B02G224600
9	GO:0006265	DNA topological change	14/1347	45/76173	2.74e-14	1.77e-12	1.19e-12	14	TraesCS1D02G260500/TraesCS6B02G295700/TraesCS6D02G246300/TraesCS3B02G214600/TraesCS1A02G260500/TraesCS1B02G271100/TraesCS3D02G188800/TraesCS6A02G268600/TraesCS5A02G467500/TraesCS7B02G119300/TraesCS5D02G480300/TraesCS5B02G479200/TraesCS4B02G280400/TraesCS3A02G184800
10	GO:0003918	"DNA topoisomerase type II (double strand cut, ATP-hydrolyzing) activity"	12/1347	29/76173	3.5e-14	2.04e-12	1.37e-12	12	TraesCS1D02G260500/TraesCS6B02G295700/TraesCS6D02G246300/TraesCS3B02G214600/TraesCS1A02G260500/TraesCS1B02G271100/TraesCS3D02G188800/TraesCS6A02G268600/TraesCS5A02G467500/TraesCS5D02G480300/TraesCS5B02G479200/TraesCS3A02G184800
11	GO:0006281	DNA repair	33/1347	372/76173	5.89e-14	3.11e-12	2.09e-12	33	TraesCS3D02G099600/TraesCS1B02G087300/TraesCS4D02G246300/TraesCS1B02G286900/TraesCS4A02G139500/TraesCS7D02G325700/TraesCS4A02G058000/TraesCS1B02G343100/TraesCS4D02G158000/TraesCS1B02G184700/TraesCS1A02G104500/TraesCS2A02G384900/TraesCS7A02G386700/TraesCS1B02G156600/TraesCS1B02G479800/TraesCS1B02G049300/TraesCS1D02G086400/TraesCS7D02G383200/TraesCS1A02G329600/TraesCS4B02G246900/TraesCS5B02G057400/…
12	GO:0000148	"1,3-beta-D-glucan synthase complex"	13/1347	40/76173	1.21e-13	4.68e-12	3.14e-12	13	TraesCS2A02G586600/TraesCS3D02G246000/TraesCS3A02G292700/TraesCS7D02G026700/TraesCS6A02G420100/TraesCS4D02G346600/TraesCS4B02G351900/TraesCS3B02G327500/TraesCS6D02G405600/TraesCS7A02G555700/TraesCS5A02G520600/TraesCS3D02G292500/TraesCS3B02G230100
13	GO:0003843	"1,3-beta-D-glucan synthase activity"	13/1347	40/76173	1.21e-13	4.68e-12	3.14e-12	13	TraesCS2A02G586600/TraesCS3D02G246000/TraesCS3A02G292700/TraesCS7D02G026700/TraesCS6A02G420100/TraesCS4D02G346600/TraesCS4B02G351900/TraesCS3B02G327500/TraesCS6D02G405600/TraesCS7A02G555700/TraesCS5A02G520600/TraesCS3D02G292500/TraesCS3B02G230100
14	GO:0005985	sucrose metabolic process	13/1347	40/76173	1.21e-13	4.68e-12	3.14e-12	13	TraesCS2D02G403600/TraesCS2B02G424300/TraesCS2A02G406700/TraesCSU02G082000/TraesCS7B02G482200/TraesCS7A02G040900/TraesCS7A02G557600/TraesCS4B02G091100/TraesCS6B02G466600/TraesCSU02G044500/TraesCS2A02G168200/TraesCS3A02G015500/TraesCS6D02G403800
15	GO:0006075	(1->3)-beta-D-glucan biosynthetic process	13/1347	40/76173	1.21e-13	4.68e-12	3.14e-12	13	TraesCS2A02G586600/TraesCS3D02G246000/TraesCS3A02G292700/TraesCS7D02G026700/TraesCS6A02G420100/TraesCS4D02G346600/TraesCS4B02G351900/TraesCS3B02G327500/TraesCS6D02G405600/TraesCS7A02G555700/TraesCS5A02G520600/TraesCS3D02G292500/TraesCS3B02G230100
16	GO:0016157	sucrose synthase activity	12/1347	34/76173	3.41e-13	1.24e-11	8.33e-12	12	TraesCS2D02G403600/TraesCS2B02G424300/TraesCS2A02G406700/TraesCSU02G082000/TraesCS7B02G482200/TraesCS7A02G040900/TraesCS7A02G557600/TraesCS6B02G466600/TraesCSU02G044500/TraesCS2A02G168200/TraesCS3A02G015500/TraesCS6D02G403800
17	GO:0004812	aminoacyl-tRNA ligase activity	24/1347	211/76173	7.75e-13	2.65e-11	1.78e-11	24	TraesCS3B02G194400/TraesCS7B02G432400/TraesCS1D02G101300/TraesCS7A02G516000/TraesCS1D02G111300/TraesCS6B02G367200/TraesCS3D02G169600/TraesCS2A02G149200/TraesCS3A02G120200/TraesCS2B02G174100/TraesCS4A02G051900/TraesCS2D02G154000/TraesCS3D02G122300/TraesCS1B02G113400/TraesCS4B02G140900/TraesCS3A02G186200/TraesCS7D02G506300/TraesCS4D02G252700/TraesCS3D02G113800/TraesCS4D02G243900/TraesCS3B02G139700/…
18	GO:0002161	aminoacyl-tRNA editing activity	12/1347	42/76173	6.04e-12	1.95e-10	1.31e-10	12	TraesCS3B02G194400/TraesCS7B02G432400/TraesCS7A02G516000/TraesCS6B02G367200/TraesCS3D02G169600/TraesCS2A02G149200/TraesCS3A02G120200/TraesCS2B02G174100/TraesCS2D02G154000/TraesCS3D02G122300/TraesCS7D02G506300/TraesCS3B02G139700
19	GO:0006418	tRNA aminoacylation for protein translation	21/1347	183/76173	1.74e-11	5.32e-10	3.57e-10	21	TraesCS3B02G194400/TraesCS7B02G432400/TraesCS7A02G516000/TraesCS1D02G111300/TraesCS6B02G367200/TraesCS3D02G169600/TraesCS2A02G149200/TraesCS3A02G120200/TraesCS2B02G174100/TraesCS4A02G051900/TraesCS2D02G154000/TraesCS3D02G122300/TraesCS1B02G113400/TraesCS3A02G186200/TraesCS7D02G506300/TraesCS4D02G252700/TraesCS3D02G113800/TraesCS4D02G243900/TraesCS3B02G139700/TraesCS5A02G069400/TraesCS5A02G160100
20	GO:0003678	DNA helicase activity	13/1347	57/76173	1.86e-11	5.4e-10	3.63e-10	13	TraesCS5D02G100800/TraesCS5A02G088400/TraesCS5B02G094600/TraesCS3D02G203400/TraesCS1B02G274600/TraesCS1B02G146200/TraesCS2A02G188100/TraesCS1A02G129400/TraesCS1D02G089500/TraesCS3A02G200400/TraesCS5B02G057400/TraesCS3B02G224600/TraesCS1D02G125300
21	GO:0003887	DNA-directed DNA polymerase activity	13/1347	68/76173	1.99e-10	5.51e-09	3.7e-09	13	TraesCS3A02G380100/TraesCS2B02G556100/TraesCS3D02G373300/TraesCS3B02G137500/TraesCS2A02G322600/TraesCS1B02G156600/TraesCS2A02G526000/TraesCS1A02G130700/TraesCS7D02G442100/TraesCS1B02G336400/TraesCS2D02G528800/TraesCS1D02G139000/TraesCS4D02G094700
22	GO:0016760	cellulose synthase (UDP-forming) activity	15/1347	100/76173	2.99e-10	7.88e-09	5.3e-09	15	TraesCS2D02G216800/TraesCS5A02G090500/TraesCS5B02G096200/TraesCS2B02G236200/TraesCS2B02G236500/TraesCS2A02G102600/TraesCS5D02G102600/TraesCS3A02G289900/TraesCS2A02G210400/TraesCS2B02G119700/TraesCS2D02G102100/TraesCS3D02G289600/TraesCS2D02G217100/TraesCS7D02G029700/TraesCS7A02G033100
23	GO:0030244	cellulose biosynthetic process	15/1347	108/76173	9.05e-10	2.29e-08	1.54e-08	15	TraesCS2D02G216800/TraesCS5A02G090500/TraesCS5B02G096200/TraesCS2B02G236200/TraesCS2B02G236500/TraesCS2A02G102600/TraesCS5D02G102600/TraesCS3A02G289900/TraesCS2A02G210400/TraesCS2B02G119700/TraesCS2D02G102100/TraesCS3D02G289600/TraesCS2D02G217100/TraesCS7D02G029700/TraesCS7A02G033100
24	GO:0006259	DNA metabolic process	10/1347	41/76173	1.97e-09	4.77e-08	3.21e-08	10	TraesCS1D02G260500/TraesCS6B02G295700/TraesCS6D02G246300/TraesCS1A02G260500/TraesCS1B02G271100/TraesCS6A02G268600/TraesCS5A02G467500/TraesCS5D02G480300/TraesCS5B02G479200/TraesCS2B02G382000
25	GO:0006189	de novo' IMP biosynthetic process	9/1347	32/76173	3.2e-09	7.45e-08	5e-08	9	TraesCS1B02G376800/TraesCS1D02G149900/TraesCS1B02G170300/TraesCS1A02G360300/TraesCS1D02G364700/TraesCS2B02G303300/TraesCS1D02G269400/TraesCS2D02G285100/TraesCS2A02G286500
26	GO:0006310	DNA recombination	12/1347	79/76173	1.53e-08	3.43e-07	2.3e-07	12	TraesCS4D02G246300/TraesCS4A02G058000/TraesCS1B02G184700/TraesCS1A02G104500/TraesCS1D02G086400/TraesCS4B02G246900/TraesCS2A02G304900/TraesCS1B02G040800/TraesCS6B02G366400/TraesCS4B02G126600/TraesCS2B02G120600/TraesCS1A02G085000
27	GO:0006396	RNA processing	20/1347	242/76173	1.67e-08	3.59e-07	2.41e-07	20	TraesCS4B02G378500/TraesCS3B02G310400/TraesCS1B02G085800/TraesCS1A02G067300/TraesCS2A02G151800/TraesCS4D02G322900/TraesCS2B02G177000/TraesCS3A02G276400/TraesCS2A02G239200/TraesCS2B02G051800/TraesCS3B02G566900/TraesCS2D02G037700/TraesCS1D02G168200/TraesCS7D02G504300/TraesCS3D02G186700/TraesCS2A02G151900/TraesCS6A02G324400/TraesCS1D02G068300/TraesCS2A02G039200/TraesCS3B02G450600
28	GO:0017056	structural constituent of nuclear pore	9/1347	42/76173	4.35e-08	9.02e-07	6.06e-07	9	TraesCS4D02G287000/TraesCS4A02G062200/TraesCS7A02G151100/TraesCS1A02G049300/TraesCS7D02G153000/TraesCS4A02G063400/TraesCS4D02G240200/TraesCS4B02G240400/TraesCS4D02G239000
29	GO:0003916	DNA topoisomerase activity	6/1347	14/76173	8.04e-08	1.61e-06	1.08e-06	6	TraesCS3B02G214600/TraesCS5A02G467500/TraesCS7B02G119300/TraesCS5D02G480300/TraesCS5B02G479200/TraesCS4B02G280400
30	GO:0006364	rRNA processing	15/1347	156/76173	1.41e-07	2.74e-06	1.84e-06	15	TraesCS4D02G264800/TraesCS7B02G293400/TraesCS7B02G238400/TraesCS7D02G334800/TraesCS3A02G277400/TraesCS2B02G243600/TraesCS5D02G051600/TraesCS7A02G517200/TraesCS2A02G447700/TraesCS3B02G600200/TraesCS3D02G277700/TraesCS5A02G253000/TraesCS2D02G225200/TraesCS2A02G218200/TraesCS1D02G412700
31	GO:0005874	microtubule	16/1347	179/76173	1.51e-07	2.83e-06	1.9e-06	16	TraesCS2D02G322800/TraesCS4A02G056100/TraesCS5B02G032700/TraesCS4D02G248200/TraesCS2A02G233300/TraesCS5D02G040800/TraesCS4A02G422800/TraesCS5A02G032500/TraesCS1B02G259800/TraesCS1D02G283300/TraesCS1A02G249100/TraesCS2D02G213200/TraesCS2B02G250000/TraesCS1B02G293500/TraesCS3D02G218300/TraesCS5B02G365600
32	GO:0016818	"hydrolase activity, acting on acid anhydrides, in phosphorus-containing anhydrides"	8/1347	38/76173	2.86e-07	5.19e-06	3.49e-06	8	TraesCS6A02G117900/TraesCS3B02G083400/TraesCS6B02G146100/TraesCS1D02G089500/TraesCS2A02G072700/TraesCS3D02G068900/TraesCS1D02G099600/TraesCS1B02G118900
33	GO:0016817	"hydrolase activity, acting on acid anhydrides"	6/1347	18/76173	4.68e-07	8e-06	5.37e-06	6	TraesCS1B02G122000/TraesCS1A02G093900/TraesCS1D02G102500/TraesCS1D02G211300/TraesCS4A02G358400/TraesCS5D02G514500
34	GO:0060236	regulation of mitotic spindle organization	6/1347	18/76173	4.68e-07	8e-06	5.37e-06	6	TraesCS4A02G056100/TraesCS4D02G248200/TraesCS2A02G233300/TraesCS4A02G422800/TraesCS2B02G250000/TraesCS5D02G176100
35	GO:0018024	histone-lysine N-methyltransferase activity	12/1347	110/76173	6.38e-07	1.06e-05	7.12e-06	12	TraesCS2A02G235400/TraesCS3A02G441200/TraesCS5D02G193000/TraesCS3D02G433900/TraesCS1B02G378900/TraesCS5A02G194500/TraesCS5D02G197700/TraesCS2A02G005000/TraesCS3B02G475200/TraesCS7D02G127100/TraesCS5A02G197900/TraesCS2D02G007100
36	GO:0051276	chromosome organization	6/1347	19/76173	6.74e-07	1.09e-05	7.31e-06	6	TraesCS3B02G423800/TraesCS1B02G326400/TraesCS1D02G314600/TraesCS1A02G314100/TraesCS3D02G384700/TraesCS3A02G391800
37	GO:0017070	U6 snRNA binding	5/1347	11/76173	7.26e-07	1.11e-05	7.46e-06	5	TraesCS5D02G201300/TraesCS7D02G128800/TraesCS7B02G029700/TraesCS7A02G129700/TraesCS5B02G193600
38	GO:0031491	nucleosome binding	5/1347	11/76173	7.26e-07	1.11e-05	7.46e-06	5	TraesCS3B02G083400/TraesCS3D02G068900/TraesCS1D02G099600/TraesCS1B02G118900/TraesCS2D02G068300
39	GO:0034968	histone lysine methylation	10/1347	75/76173	8.47e-07	1.26e-05	8.48e-06	10	TraesCS2A02G235400/TraesCS3A02G441200/TraesCS5D02G193000/TraesCS3D02G433900/TraesCS1B02G378900/TraesCS5A02G194500/TraesCS5D02G197700/TraesCS3B02G475200/TraesCS5A02G197900/TraesCS2D02G007100
40	GO:0003714	transcription corepressor activity	8/1347	45/76173	1.13e-06	1.64e-05	1.1e-05	8	TraesCS2D02G303600/TraesCS1A02G002700/TraesCS2A02G305000/TraesCS5B02G391200/TraesCS1D02G004900/TraesCS3B02G005900/TraesCS1B02G002000/TraesCS2B02G321800
41	GO:0003774	motor activity	9/1347	66/76173	2.47e-06	3.5e-05	2.35e-05	9	TraesCS2D02G322800/TraesCS3B02G239700/TraesCS2D02G154600/TraesCS6D02G316500/TraesCS3D02G212400/TraesCS3A02G209500/TraesCS3D02G248700/TraesCS2D02G213200/TraesCS3B02G278600
42	GO:0008173	RNA methyltransferase activity	7/1347	36/76173	2.84e-06	3.93e-05	2.64e-05	7	TraesCS4B02G378500/TraesCS3B02G310400/TraesCS3A02G276400/TraesCS2B02G051800/TraesCS2D02G037700/TraesCS3B02G600200/TraesCS2A02G039200
43	GO:0004823	leucine-tRNA ligase activity	5/1347	14/76173	3.01e-06	3.97e-05	2.67e-05	5	TraesCS3B02G194400/TraesCS3D02G169600/TraesCS2A02G149200/TraesCS2B02G174100/TraesCS2D02G154000
44	GO:0006429	leucyl-tRNA aminoacylation	5/1347	14/76173	3.01e-06	3.97e-05	2.67e-05	5	TraesCS3B02G194400/TraesCS3D02G169600/TraesCS2A02G149200/TraesCS2B02G174100/TraesCS2D02G154000
45	GO:0000373	Group II intron splicing	6/1347	25/76173	4.02e-06	5.07e-05	3.41e-05	6	TraesCS4A02G150500/TraesCS4B02G161000/TraesCS6B02G297400/TraesCS1D02G417900/TraesCS4D02G150700/TraesCS6A02G270100
46	GO:0006261	DNA-dependent DNA replication	6/1347	25/76173	4.02e-06	5.07e-05	3.41e-05	6	TraesCS3B02G112900/TraesCS2B02G556100/TraesCS3B02G137500/TraesCS2A02G526000/TraesCS1B02G336400/TraesCS2D02G528800
47	GO:0007076	mitotic chromosome condensation	5/1347	15/76173	4.45e-06	5.5e-05	3.7e-05	5	TraesCS2A02G129900/TraesCS7D02G207100/TraesCS2B02G152100/TraesCS7B02G111000/TraesCS2D02G132100
48	GO:0051301	cell division	8/1347	56/76173	6.27e-06	7.59e-05	5.1e-05	8	TraesCS2A02G129900/TraesCS1A02G208400/TraesCS1D02G211600/TraesCS1B02G222400/TraesCS2A02G447700/TraesCS6B02G375500/TraesCS1B02G336400/TraesCS2D02G132100
49	GO:0016874	ligase activity	10/1347	95/76173	7.51e-06	8.9e-05	5.98e-05	10	TraesCS1D02G101300/TraesCS2B02G104300/TraesCS3D02G169600/TraesCS2A02G149200/TraesCS1A02G208400/TraesCS1D02G211600/TraesCS1B02G222400/TraesCS2D02G068100/TraesCS2B02G279400/TraesCS5D02G111500
50	GO:0032147	activation of protein kinase activity	5/1347	18/76173	1.21e-05	0.000141075	9.48e-05	5	TraesCS4A02G056100/TraesCS4D02G248200/TraesCS2A02G233300/TraesCS4A02G422800/TraesCS2B02G250000
51	GO:0009934	regulation of meristem structural organization	4/1347	10/76173	1.88e-05	0.000209839	0.000141046	4	TraesCS5A02G336500/TraesCS5B02G335500/TraesCS5D02G341200/TraesCS6B02G375500
52	GO:0006413	translational initiation	11/1347	128/76173	1.88e-05	0.000209839	0.000141046	11	TraesCS7B02G183700/TraesCS7A02G287900/TraesCS2D02G594500/TraesCS3B02G019500/TraesCS5D02G416000/TraesCS2D02G353600/TraesCS5D02G228100/TraesCS5B02G219100/TraesCS2B02G235100/TraesCS5A02G220000/TraesCS3D02G020200
53	GO:0000049	tRNA binding	8/1347	66/76173	2.17e-05	0.000237813	0.000159849	8	TraesCS2D02G347600/TraesCS7B02G432400/TraesCS7A02G516000/TraesCS6B02G367200/TraesCS4B02G140900/TraesCS7D02G506300/TraesCS4D02G243900/TraesCS5A02G069400
54	GO:0004825	methionine-tRNA ligase activity	4/1347	12/76173	4.3e-05	0.000446379	0.000300039	4	TraesCS4A02G051900/TraesCS4D02G252700/TraesCS4D02G243900/TraesCS5A02G069400
55	GO:0006431	methionyl-tRNA aminoacylation	4/1347	12/76173	4.3e-05	0.000446379	0.000300039	4	TraesCS4A02G051900/TraesCS4D02G252700/TraesCS4D02G243900/TraesCS5A02G069400
56	GO:1900865	chloroplast RNA modification	4/1347	12/76173	4.3e-05	0.000446379	0.000300039	4	TraesCS5D02G054700/TraesCS3A02G137000/TraesCS3B02G154900/TraesCS3D02G137800
57	GO:0010468	regulation of gene expression	6/1347	39/76173	5.99e-05	0.000610518	0.000410367	6	TraesCS2A02G150300/TraesCS2B02G175400/TraesCS2D02G155400/TraesCS4D02G109800/TraesCS5A02G123700/TraesCS1B02G336400
58	GO:0031047	gene silencing by RNA	10/1347	124/76173	7.65e-05	0.000766422	0.00051516	10	TraesCS7B02G431600/TraesCS3D02G191600/TraesCS2A02G419500/TraesCSU02G065300/TraesCS2A02G334100/TraesCS3A02G188400/TraesCS2A02G419900/TraesCS1B02G480100/TraesCS4A02G197000/TraesCS3B02G450600
59	GO:0016571	histone methylation	6/1347	42/76173	9.21e-05	0.000906511	0.000609322	6	TraesCS2A02G235400/TraesCS3A02G441200/TraesCS3D02G433900/TraesCS1B02G378900/TraesCS5A02G194500/TraesCS5D02G197700
60	GO:0009793	embryo development ending in seed dormancy	12/1347	181/76173	0.000102921	0.000996622	0.000669892	12	TraesCS1A02G264000/TraesCS2D02G241800/TraesCS3B02G304400/TraesCS1B02G274600/TraesCS7D02G162800/TraesCS2D02G352100/TraesCS3B02G137500/TraesCS6B02G270600/TraesCS2A02G403371/TraesCS3A02G270600/TraesCS2A02G447700/TraesCS3D02G270400
61	GO:0005852	eukaryotic translation initiation factor 3 complex	7/1347	64/76173	0.000137471	0.00130935	0.000880099	7	TraesCS3A02G025500/TraesCS3B02G019500/TraesCS5D02G416000/TraesCS5D02G228100/TraesCS5B02G219100/TraesCS5A02G220000/TraesCS3D02G020200
62	GO:0009555	pollen development	8/1347	86/76173	0.000146901	0.00137661	0.000925303	8	TraesCS5D02G100800/TraesCS5A02G088400/TraesCS5A02G336500/TraesCS5B02G335500/TraesCS5D02G341200/TraesCS5D02G176100/TraesCS3B02G224600/TraesCS7A02G280700
63	GO:0003682	chromatin binding	9/1347	111/76173	0.00016602	0.00153108	0.00102913	9	TraesCS6B02G419000/TraesCS2B02G260800/TraesCS2D02G241800/TraesCS2A02G235900/TraesCS3B02G112900/TraesCS6A02G380200/TraesCS6D02G364900/TraesCS3D02G196600/TraesCS2D02G132100
64	GO:0005819	spindle	5/1347	30/76173	0.000169326	0.00153717	0.00103323	5	TraesCS4A02G056100/TraesCS4D02G248200/TraesCS2A02G233300/TraesCS4A02G422800/TraesCS2B02G250000
65	GO:0032968	positive regulation of transcription elongation from RNA polymerase II promoter	4/1347	17/76173	0.000192763	0.00172301	0.00115814	4	TraesCS1D02G311400/TraesCS1A02G311400/TraesCS1B02G322900/TraesCS2D02G068300
66	GO:0008641	ubiquitin-like modifier activating enzyme activity	6/1347	48/76173	0.000196795	0.00173239	0.00116445	6	TraesCS2B02G104300/TraesCS5D02G490100/TraesCS4A02G180800/TraesCS2D02G086700/TraesCS5D02G157800/TraesCS4D02G131600
67	GO:0007049	cell cycle	4/1347	18/76173	0.00024437	0.00205766	0.00138308	4	TraesCS5D02G100800/TraesCS5A02G088400/TraesCS5B02G094600/TraesCS2D02G132100
68	GO:0042793	plastid transcription	4/1347	18/76173	0.00024437	0.00205766	0.00138308	4	TraesCS2B02G004000/TraesCS2D02G014800/TraesCS5B02G500100/TraesCS5D02G500300
69	GO:0071897	DNA biosynthetic process	4/1347	18/76173	0.00024437	0.00205766	0.00138308	4	TraesCS3A02G380100/TraesCS3B02G137500/TraesCS1B02G184700/TraesCS2D02G528800
70	GO:0006464	cellular protein modification process	6/1347	51/76173	0.000276113	0.00229174	0.00154042	6	TraesCS2B02G104300/TraesCS4A02G180800/TraesCS2D02G086700/TraesCS5D02G157800/TraesCS4D02G131600/TraesCS4D02G292900
71	GO:0016573	histone acetylation	5/1347	34/76173	0.000311844	0.00255185	0.00171525	5	TraesCS1B02G116100/TraesCS2D02G145300/TraesCS6B02G135800/TraesCS7D02G407600/TraesCS2B02G052300
72	GO:0016459	myosin complex	5/1347	35/76173	0.000358543	0.00285361	0.00191809	5	TraesCS3B02G239700/TraesCS6D02G316500/TraesCS3D02G212400/TraesCS3A02G209500/TraesCS3D02G248700
73	GO:0032040	small-subunit processome	5/1347	35/76173	0.000358543	0.00285361	0.00191809	5	TraesCS7B02G238400/TraesCS5B02G283900/TraesCS7D02G334800/TraesCS7A02G517200/TraesCS2A02G447700
74	GO:0032508	DNA duplex unwinding	4/1347	20/76173	0.000376173	0.00293733	0.00197436	4	TraesCS5D02G100800/TraesCS5A02G088400/TraesCS1B02G274600/TraesCS5B02G057400
75	GO:0003899	DNA-directed 5'-3' RNA polymerase activity	11/1347	179/76173	0.000379173	0.00293733	0.00197436	11	TraesCS7B02G411000/TraesCS2B02G552400/TraesCS7D02G335500/TraesCS6D02G113900/TraesCS1D02G108700/TraesCS5B02G515600/TraesCS5D02G515800/TraesCS6D02G140000/TraesCS5D02G383900/TraesCS7B02G202000/TraesCS7A02G301900
76	GO:0006479	protein methylation	5/1347	37/76173	0.000467582	0.00348288	0.00234106	5	TraesCS6B02G137700/TraesCS6D02G097500/TraesCS1A02G315500/TraesCS7D02G011700/TraesCS6A02G109100
77	GO:0030983	mismatched DNA binding	5/1347	37/76173	0.000467582	0.00348288	0.00234106	5	TraesCS1D02G131600/TraesCS1A02G135100/TraesCS3D02G119400/TraesCS2D02G359500/TraesCS1B02G149700
78	GO:0031408	oxylipin biosynthetic process	5/1347	37/76173	0.000467582	0.00348288	0.00234106	5	TraesCS5A02G007900/TraesCS5D02G388800/TraesCS4B02G037900/TraesCS5B02G006500/TraesCS4B02G295200
79	GO:0006457	protein folding	15/1347	312/76173	0.000520291	0.00382644	0.00257199	15	TraesCS7A02G358400/TraesCS6A02G313700/TraesCS5B02G106300/TraesCS5A02G115000/TraesCS5D02G113700/TraesCS4D02G157300/TraesCS5A02G101900/TraesCS7D02G032800/TraesCS7A02G036200/TraesCS7B02G269300/TraesCS4B02G307700/TraesCS6B02G343800/TraesCS1D02G144000/TraesCS6D02G167200/TraesCS4A02G164900
80	GO:0006298	mismatch repair	5/1347	38/76173	0.000530632	0.00385371	0.00259032	5	TraesCS1D02G131600/TraesCS1A02G135100/TraesCS3D02G119400/TraesCS2D02G359500/TraesCS1B02G149700
81	GO:0031369	translation initiation factor binding	4/1347	22/76173	0.000552195	0.00396081	0.0026623	4	TraesCS5D02G416000/TraesCS5D02G228100/TraesCS5B02G219100/TraesCS5A02G220000
82	GO:0000712	resolution of meiotic recombination intermediates	3/1347	10/76173	0.000603308	0.00417288	0.00280486	3	TraesCS7A02G386700/TraesCS7D02G383200/TraesCS7B02G289500
83	GO:0010239	chloroplast mRNA processing	3/1347	10/76173	0.000603308	0.00417288	0.00280486	3	TraesCS3B02G304400/TraesCS3A02G270600/TraesCS3D02G270400
84	GO:0016123	xanthophyll biosynthetic process	3/1347	10/76173	0.000603308	0.00417288	0.00280486	3	TraesCS2A02G239200/TraesCS2D02G246100/TraesCS3D02G211700
85	GO:0000724	double-strand break repair via homologous recombination	6/1347	60/76173	0.000670882	0.00458568	0.00308232	6	TraesCS3D02G099600/TraesCS5A02G336500/TraesCS5B02G335500/TraesCS5D02G341200/TraesCS1B02G479800/TraesCS1A02G329600
86	GO:0004832	valine-tRNA ligase activity	3/1347	11/76173	0.00081864	0.00534415	0.00359214	3	TraesCS3A02G120200/TraesCS3D02G122300/TraesCS3B02G139700
87	GO:0006438	valyl-tRNA aminoacylation	3/1347	11/76173	0.00081864	0.00534415	0.00359214	3	TraesCS3A02G120200/TraesCS3D02G122300/TraesCS3B02G139700
88	GO:0090116	C-5 methylation of cytosine	3/1347	11/76173	0.00081864	0.00534415	0.00359214	3	TraesCS2B02G260800/TraesCS2D02G241800/TraesCS2A02G235900
89	GO:0106074	aminoacyl-tRNA metabolism involved in translational fidelity	3/1347	11/76173	0.00081864	0.00534415	0.00359214	3	TraesCS3D02G169600/TraesCS2A02G149200/TraesCS3B02G139700
90	GO:0003743	translation initiation factor activity	10/1347	168/76173	0.000880175	0.00568202	0.00381924	10	TraesCS7B02G183700/TraesCS7A02G287900/TraesCS3B02G019500/TraesCS5D02G416000/TraesCS2D02G353600/TraesCS5D02G228100/TraesCS5B02G219100/TraesCS2B02G235100/TraesCS5A02G220000/TraesCS3D02G020200
91	GO:0016307	phosphatidylinositol phosphate kinase activity	6/1347	64/76173	0.000946483	0.00597725	0.00401768	6	TraesCS3A02G385500/TraesCS3D02G378500/TraesCS7B02G225600/TraesCS3B02G417700/TraesCS2B02G217700/TraesCS2D02G198300
92	GO:0046488	phosphatidylinositol metabolic process	6/1347	64/76173	0.000946483	0.00597725	0.00401768	6	TraesCS3A02G385500/TraesCS3D02G378500/TraesCS7B02G225600/TraesCS3B02G417700/TraesCS2B02G217700/TraesCS2D02G198300
93	GO:0007062	sister chromatid cohesion	4/1347	26/76173	0.00106692	0.00651917	0.00438194	4	TraesCS5D02G310000/TraesCS3B02G112900/TraesCS1B02G479800/TraesCS3A02G097200
94	GO:0003886	DNA (cytosine-5-)-methyltransferase activity	3/1347	12/76173	0.00107718	0.00651917	0.00438194	3	TraesCS2B02G260800/TraesCS2D02G241800/TraesCS2A02G235900
95	GO:0008360	regulation of cell shape	3/1347	12/76173	0.00107718	0.00651917	0.00438194	3	TraesCS1A02G208400/TraesCS1D02G211600/TraesCS1B02G222400
96	GO:0016881	acid-amino acid ligase activity	3/1347	12/76173	0.00107718	0.00651917	0.00438194	3	TraesCS1A02G208400/TraesCS1D02G211600/TraesCS1B02G222400
97	GO:0019538	protein metabolic process	6/1347	66/76173	0.00111332	0.00666845	0.00448228	6	TraesCS2B02G304200/TraesCS6B02G233800/TraesCS7B02G183200/TraesCS2D02G285800/TraesCS2A02G287300/TraesCS6B02G174500
98	GO:0005694	chromosome	18/1347	445/76173	0.00114911	0.00681258	0.00457916	18	TraesCS3B02G423800/TraesCS1B02G326400/TraesCS1D02G314600/TraesCS3B02G214600/TraesCS1A02G314100/TraesCS3A02G441200/TraesCS3D02G188800/TraesCS3D02G433900/TraesCS3D02G384700/TraesCS3A02G391800/TraesCS5A02G467500/TraesCS7B02G119300/TraesCS5D02G480300/TraesCS5A02G194500/TraesCS5D02G197700/TraesCS5B02G479200/TraesCS4B02G280400/TraesCS3A02G184800
99	GO:0016282	eukaryotic 43S preinitiation complex	5/1347	46/76173	0.00128984	0.00756968	0.00508806	5	TraesCS3B02G019500/TraesCS5D02G416000/TraesCS5D02G228100/TraesCS5B02G219100/TraesCS3D02G020200
100	GO:0006090	pyruvate metabolic process	3/1347	13/76173	0.00138195	0.00787169	0.00529105	3	TraesCS4A02G481800/TraesCS1B02G264900/TraesCS1D02G252900
101	GO:0006471	protein ADP-ribosylation	3/1347	13/76173	0.00138195	0.00787169	0.00529105	3	TraesCS1B02G049300/TraesCS7A02G414700/TraesCS7D02G407800
102	GO:0010305	leaf vascular tissue pattern formation	3/1347	13/76173	0.00138195	0.00787169	0.00529105	3	TraesCS3A02G137000/TraesCS3B02G154900/TraesCS3D02G137800
103	GO:0004373	glycogen (starch) synthase activity	4/1347	28/76173	0.00142084	0.00794733	0.0053419	4	TraesCS1D02G100100/TraesCS1B02G119300/TraesCS2B02G491700/TraesCS2A02G468800
104	GO:0033290	eukaryotic 48S preinitiation complex	5/1347	47/76173	0.00142259	0.00794733	0.0053419	5	TraesCS3B02G019500/TraesCS5D02G416000/TraesCS5D02G228100/TraesCS5B02G219100/TraesCS3D02G020200
105	GO:0005643	nuclear pore	6/1347	70/76173	0.00151372	0.00837592	0.00562998	6	TraesCS4D02G287000/TraesCS1A02G049300/TraesCS4A02G063400/TraesCS4D02G240200/TraesCS4B02G240400/TraesCS6A02G175000
106	GO:0030170	pyridoxal phosphate binding	14/1347	316/76173	0.00170158	0.00932661	0.00626899	14	TraesCS2A02G315800/TraesCS1B02G232200/TraesCS2D02G313800/TraesCS1D02G378600/TraesCS1D02G220400/TraesCS4D02G189600/TraesCS2B02G334000/TraesCS1A02G371900/TraesCS1B02G391900/TraesCS2B02G557800/TraesCS4A02G116000/TraesCS3D02G359200/TraesCS1D02G289800/TraesCS4B02G188200
107	GO:0001732	formation of cytoplasmic translation initiation complex	5/1347	49/76173	0.00171787	0.00932788	0.00626985	5	TraesCS3B02G019500/TraesCS5D02G416000/TraesCS5D02G228100/TraesCS5B02G219100/TraesCS3D02G020200
108	GO:0008283	cell population proliferation	4/1347	30/76173	0.00184926	0.00994833	0.00668689	4	TraesCS5A02G336500/TraesCS5B02G335500/TraesCS5D02G341200/TraesCS2D02G212000
109	GO:0006974	cellular response to DNA damage stimulus	5/1347	50/76173	0.00188127	0.0100277	0.00674022	5	TraesCS1B02G343100/TraesCS2B02G104300/TraesCS2A02G384900/TraesCS1A02G329600/TraesCS2B02G401900
110	GO:2001070	starch binding	4/1347	31/76173	0.00209375	0.0110588	0.00743331	4	TraesCS1D02G100100/TraesCS1B02G119300/TraesCS2B02G491700/TraesCS2A02G468800
111	GO:0030261	chromosome condensation	3/1347	15/76173	0.00214129	0.011108	0.00746635	3	TraesCS2A02G129900/TraesCS2B02G152100/TraesCS2D02G132100
112	GO:0046524	sucrose-phosphate synthase activity	3/1347	15/76173	0.00214129	0.011108	0.00746635	3	TraesCS4B02G091100/TraesCSU02G044500/TraesCS3A02G015500
113	GO:0008080	N-acetyltransferase activity	8/1347	131/76173	0.00239395	0.0122007	0.00820088	8	TraesCS2B02G622700/TraesCS2D02G303600/TraesCS2D02G571900/TraesCS2A02G305000/TraesCS2A02G563500/TraesCS5B02G391200/TraesCS2D02G238100/TraesCS2B02G321800
114	GO:0051539	"4 iron, 4 sulfur cluster binding"	8/1347	131/76173	0.00239395	0.0122007	0.00820088	8	TraesCS1B02G286900/TraesCS3A02G380100/TraesCS3D02G373300/TraesCS5B02G109900/TraesCS6D02G197800/TraesCS5A02G169000/TraesCS6A02G215500/TraesCS4D02G094700
115	GO:0044237	cellular metabolic process	5/1347	53/76173	0.00243966	0.0123256	0.00828478	5	TraesCS2A02G304900/TraesCS2B02G192900/TraesCS6D02G197800/TraesCS2B02G120600/TraesCS6A02G215500
116	GO:0010449	root meristem growth	3/1347	16/76173	0.00260094	0.0129158	0.00868149	3	TraesCS5A02G336500/TraesCS5B02G335500/TraesCS5D02G341200
117	GO:0032300	mismatch repair complex	3/1347	16/76173	0.00260094	0.0129158	0.00868149	3	TraesCS1D02G131600/TraesCS1A02G135100/TraesCS1B02G149700
118	GO:0042026	protein refolding	5/1347	55/76173	0.0028731	0.0140768	0.0094619	5	TraesCS7D02G032800/TraesCS7A02G036200/TraesCS4B02G307700/TraesCS1D02G144000/TraesCS6B02G174500
119	GO:0061630	ubiquitin protein ligase activity	8/1347	135/76173	0.0028832	0.0140768	0.0094619	8	TraesCS3D02G072000/TraesCS3B02G086400/TraesCS3D02G073100/TraesCS3B02G087600/TraesCS3A02G073400/TraesCS5D02G480800/TraesCS3A02G072400/TraesCS7A02G350000
120	GO:0000911	cytokinesis by cell plate formation	3/1347	17/76173	0.00311697	0.0147233	0.00989642	3	TraesCS3B02G307100/TraesCS3A02G273500/TraesCS2B02G110500
121	GO:0009306	protein secretion	3/1347	17/76173	0.00311697	0.0147233	0.00989642	3	TraesCS3D02G120800/TraesCS3B02G137900/TraesCS3A02G118900
122	GO:0010087	phloem or xylem histogenesis	3/1347	17/76173	0.00311697	0.0147233	0.00989642	3	TraesCS3A02G137000/TraesCS3B02G154900/TraesCS3D02G137800
123	GO:0090114	COPII-coated vesicle budding	3/1347	17/76173	0.00311697	0.0147233	0.00989642	3	TraesCS4B02G163100/TraesCS1B02G057100/TraesCS4D02G151400
124	GO:0030976	thiamine pyrophosphate binding	4/1347	36/76173	0.00365555	0.016991	0.0114207	4	TraesCS2D02G283300/TraesCS2D02G076900/TraesCS2B02G094300/TraesCS3D02G104500
125	GO:0070290	N-acylphosphatidylethanolamine-specific phospholipase D activity	4/1347	36/76173	0.00365555	0.016991	0.0114207	4	TraesCS1D02G379900/TraesCS1B02G393300/TraesCS7B02G277900/TraesCS4B02G377600
126	GO:0004470	malic enzyme activity	3/1347	18/76173	0.00369149	0.0170219	0.0114415	3	TraesCS3B02G320200/TraesCS1D02G164800/TraesCS3A02G285900
127	GO:0004351	glutamate decarboxylase activity	3/1347	19/76173	0.00432642	0.0193358	0.0129968	3	TraesCS2A02G315800/TraesCS2D02G313800/TraesCS2B02G334000
128	GO:0004471	malate dehydrogenase (decarboxylating) (NAD+) activity	3/1347	19/76173	0.00432642	0.0193358	0.0129968	3	TraesCS3B02G320200/TraesCS1D02G164800/TraesCS3A02G285900
129	GO:0006536	glutamate metabolic process	3/1347	19/76173	0.00432642	0.0193358	0.0129968	3	TraesCS2A02G315800/TraesCS2D02G313800/TraesCS2B02G334000
130	GO:0016624	"oxidoreductase activity, acting on the aldehyde or oxo group of donors, disulfide as acceptor"	3/1347	19/76173	0.00432642	0.0193358	0.0129968	3	TraesCS2D02G283300/TraesCS2D02G076900/TraesCS2B02G094300
131	GO:0048366	leaf development	4/1347	38/76173	0.00445506	0.0197587	0.0132811	4	TraesCS5A02G336500/TraesCS5B02G335500/TraesCS5D02G341200/TraesCS3B02G154900
132	GO:0000723	telomere maintenance	3/1347	20/76173	0.00502353	0.0219449	0.0147505	3	TraesCS5B02G057400/TraesCS5A02G081400/TraesCS5D02G091200
133	GO:0006094	gluconeogenesis	3/1347	20/76173	0.00502353	0.0219449	0.0147505	3	TraesCS4D02G220500/TraesCS4B02G220200/TraesCS4A02G083900
134	GO:0102229	amylopectin maltohydrolase activity	3/1347	21/76173	0.00578441	0.0250802	0.016858	3	TraesCS2A02G215100/TraesCS2B02G240100/TraesCS2D02G220900
135	GO:0046470	phosphatidylcholine metabolic process	4/1347	43/76173	0.0069487	0.0299051	0.0201011	4	TraesCS1D02G379900/TraesCS1B02G393300/TraesCS7B02G277900/TraesCS4B02G377600
136	GO:0006338	chromatin remodeling	4/1347	44/76173	0.00753836	0.0322043	0.0216465	4	TraesCS3B02G083400/TraesCS3D02G068900/TraesCS1D02G099600/TraesCS1B02G118900
137	GO:0032259	methylation	7/1347	127/76173	0.00761726	0.0323038	0.0217134	7	TraesCS2D02G241800/TraesCS2D02G037700/TraesCS3B02G452900/TraesCS4D02G311200/TraesCS7B02G331000/TraesCS7B02G245500/TraesCS1D02G412700
138	GO:0001522	pseudouridine synthesis	5/1347	70/76173	0.00805317	0.033905	0.0227897	5	TraesCS1D02G323100/TraesCS2A02G151800/TraesCS2B02G177000/TraesCS4D02G268600/TraesCS2A02G151900
139	GO:0016036	cellular response to phosphate starvation	4/1347	45/76173	0.00816001	0.0341077	0.0229259	4	TraesCS1B02G415800/TraesCS2A02G239200/TraesCS2D02G246100/TraesCS1D02G286300
140	GO:0003950	NAD+ ADP-ribosyltransferase activity	3/1347	24/76173	0.00846375	0.0346298	0.0232769	3	TraesCS1B02G049300/TraesCS7A02G414700/TraesCS7D02G407800
141	GO:0019867	outer membrane	3/1347	24/76173	0.00846375	0.0346298	0.0232769	3	TraesCS4B02G209200/TraesCS4A02G095300/TraesCS4D02G209900
142	GO:0032549	ribonucleoside binding	3/1347	24/76173	0.00846375	0.0346298	0.0232769	3	TraesCS2B02G552400/TraesCS6D02G140000/TraesCS5D02G383900
143	GO:0004630	phospholipase D activity	4/1347	46/76173	0.00881431	0.035812	0.0240715	4	TraesCS1D02G379900/TraesCS1B02G393300/TraesCS7B02G277900/TraesCS4B02G377600
144	GO:0000184	"nuclear-transcribed mRNA catabolic process, nonsense-mediated decay"	3/1347	25/76173	0.00949305	0.0377771	0.0253924	3	TraesCS6B02G449100/TraesCS6A02G221700/TraesCS6D02G388100
145	GO:0001510	RNA methylation	3/1347	25/76173	0.00949305	0.0377771	0.0253924	3	TraesCS2D02G037700/TraesCS7B02G331000/TraesCS1D02G412700
146	GO:0043248	proteasome assembly	3/1347	25/76173	0.00949305	0.0377771	0.0253924	3	TraesCS5A02G137600/TraesCS5D02G154400/TraesCS5B02G136300
147	GO:0005777	peroxisome	7/1347	133/76173	0.0096933	0.0383116	0.0257516	7	TraesCS2A02G150300/TraesCS2B02G175400/TraesCS2D02G155400/TraesCS4D02G109800/TraesCS5A02G123700/TraesCS7D02G225100/TraesCS7A02G223500
148	GO:0003712	transcription coregulator activity	7/1347	135/76173	0.0104691	0.0410983	0.0276248	7	TraesCS1B02G433100/TraesCS1D02G411400/TraesCS6B02G135800/TraesCS7D02G407600/TraesCS7A02G283500/TraesCS2B02G260900/TraesCS2B02G052300
149	GO:0009658	chloroplast organization	6/1347	104/76173	0.0105995	0.0413311	0.0277812	6	TraesCS3B02G304400/TraesCS2B02G004000/TraesCS2D02G014800/TraesCS1B02G182500/TraesCS3A02G270600/TraesCS3D02G270400
150	GO:0071786	endoplasmic reticulum tubular network organization	2/1347	10/76173	0.0127968	0.0495664	0.0333166	2	TraesCS6D02G401700/TraesCS6A02G416500
